# Supplementary material for: Seasonal Trend of Viral Prevalence and Incidence of Febrile Convulsion: A Korea Public Health Data Analysis
Source: MDPI journal article supplement (doi:10.3390/children10030529), 2023-03-09

| Mon<br>PDR(%) | Jan   | Feb   | Mar   | Apr   | May   | Jun   | Jul   | Aug   | Sep   | Oct   | Nov   | Dec   |
|---------------|-------|-------|-------|-------|-------|-------|-------|-------|-------|-------|-------|-------|
| HAdV          |       |       |       |       |       |       |       |       |       |       |       |       |
| 2015          | 5.04  | 2.15  | 2.83  | 4.70  | 4.83  | 5.63  | 3.32  | 3.18  | 2.30  | 6.98  | 9.03  | 8.78  |
| 2016          | 9.18  | 3.88  | 3.93  | 5.54  | 6.53  | 6.95  | 7.16  | 9.48  | 9.58  | 6.50  | 5.83  | 3.24  |
| 2017          | 3.72  | 2.53  | 2.43  | 2.74  | 6.05  | 4.73  | 2.96  | 5.18  | 4.33  | 3.78  | 4.73  | 2.60  |
| 2018          | 2.98  | 2.80  | 4.25  | 5.38  | 5.45  | 6.80  | 5.82  | 9.55  | 13.33 | 11.30 | 10.70 | 7.63  |
| 2019          | 6.68  | 5.05  | 4.85  | 4.43  | 7.84  | 10.40 | 7.52  | 12.88 | 10.20 | 9.44  | 9.75  | 8.83  |
| HPIV          |       |       |       |       |       |       |       |       |       |       |       |       |
| 2015          | 0.92  | 0.55  | 0.78  | 6.30  | 17.65 | 11.75 | 7.04  | 6.28  | 8.93  | 4.72  | 9.53  | 4.08  |
| 2016          | 2.24  | 1.30  | 1.40  | 5.60  | 16.55 | 16.23 | 9.68  | 10.25 | 8.68  | 4.56  | 1.95  | 0.78  |
| 2017          | 1.58  | 1.70  | 2.98  | 8.38  | 19.43 | 12.83 | 9.68  | 8.95  | 4.60  | 3.04  | 3.33  | 2.68  |
| 2018          | 0.84  | 1.60  | 3.25  | 9.44  | 19.10 | 16.78 | 11.12 | 7.75  | 4.33  | 4.00  | 1.75  | 1.03  |
| 2019          | 1.06  | 1.10  | 2.33  | 3.48  | 13.56 | 20.35 | 15.74 | 9.70  | 7.58  | 3.98  | 2.55  | 1.65  |
| HRSV          |       |       |       |       |       |       |       |       |       |       |       |       |
| 2015          | 8.70  | 2.15  | 1.55  | 0.40  | 0.58  | 0.45  | 0.12  | 0.13  | 0.00  | 0.96  | 4.13  | 14.40 |
| 2016          | 8.56  | 1.00  | 1.43  | 0.56  | 0.70  | 0.15  | 0.34  | 0.28  | 1.78  | 6.46  | 17.83 | 13.02 |
| 2017          | 5.16  | 3.83  | 2.53  | 0.64  | 0.10  | 0.23  | 0.60  | 0.85  | 3.30  | 5.24  | 17.25 | 10.73 |
| 2018          | 4.58  | 4.25  | 3.65  | 0.64  | 0.50  | 0.40  | 0.72  | 1.05  | 1.55  | 4.52  | 13.95 | 11.20 |
| 2019          | 6.40  | 3.80  | 1.65  | 0.70  | 0.44  | 0.10  | 0.10  | 0.85  | 1.68  | 3.72  | 10.10 | 11.73 |
| IFV           |       |       |       |       |       |       |       |       |       |       |       |       |
| 2015          | 22.80 | 48.85 | 45.28 | 25.96 | 3.10  | 0.33  | 0.14  | 0.00  | 0.38  | 0.10  | 0.48  | 1.53  |
| 2016          | 15.24 | 47.55 | 36.95 | 26.60 | 5.00  | 0.70  | 0.22  | 0.28  | 0.25  | 0.40  | 0.80  | 35.50 |
| 2017          | 26.20 | 7.70  | 8.95  | 12.72 | 5.03  | 2.20  | 1.10  | 0.55  | 0.93  | 0.66  | 4.05  | 41.55 |
| 2018          | 58.50 | 35.63 | 10.55 | 3.46  | 2.80  | 1.08  | 0.50  | 0.30  | 0.58  | 1.78  | 11.15 | 35.35 |
| 2019          | 28.20 | 9.13  | 20.80 | 34.85 | 10.52 | 2.10  | 0.40  | 0.35  | 0.63  | 3.44  | 10.08 | 23.95 |
| HCoV          |       |       |       |       |       |       |       |       |       |       |       |       |
| 2015          | 8.74  | 1.40  | 0.95  | 0.56  | 0.10  | 0.50  | 0.58  | 0.60  | 0.38  | 1.38  | 1.80  | 5.53  |
| 2016          | 7.96  | 3.98  | 4.95  | 4.26  | 4.90  | 3.08  | 3.94  | 4.53  | 4.68  | 4.24  | 7.80  | 9.82  |
| 2017          | 10.26 | 6.45  | 5.15  | 3.62  | 2.68  | 2.35  | 1.02  | 1.45  | 1.55  | 2.14  | 5.15  | 7.20  |
| 2018          | 6.76  | 9.88  | 7.73  | 3.52  | 0.85  | 0.48  | 1.00  | 3.13  | 2.60  | 5.80  | 10.93 | 9.83  |
| 2019          | 5.48  | 3.70  | 2.83  | 1.38  | 0.92  | 1.68  | 0.64  | 0.45  | 1.05  | 1.94  | 3.35  | 7.55  |
| HRV           |       |       |       |       |       |       |       |       |       |       |       |       |
| 2015          | 8.80  | 7.73  | 10.08 | 15.84 | 17.10 | 19.30 | 21.62 | 18.10 | 25.40 | 28.82 | 29.03 | 16.78 |
| 2016          | 8.52  | 3.78  | 12.28 | 15.44 | 19.55 | 16.38 | 19.62 | 19.60 | 18.40 | 24.56 | 20.68 | 8.02  |
| 2017          | 9.56  | 15.40 | 20.90 | 18.66 | 14.78 | 17.78 | 21.40 | 30.63 | 33.10 | 24.68 | 23.88 | 6.83  |
| 2018          | 2.52  | 5.95  | 20.63 | 28.34 | 21.53 | 20.18 | 21.14 | 12.70 | 24.63 | 22.08 | 15.70 | 9.78  |
| 2019          | 8.68  | 14.33 | 18.85 | 16.43 | 19.82 | 17.45 | 23.00 | 13.45 | 21.48 | 22.62 | 19.65 | 11.45 |
| HBoV          |       |       |       |       |       |       |       |       |       |       |       |       |

|                           |       |       |       |       |       |       |      |      |       |       |       |       |
|---------------------------|-------|-------|-------|-------|-------|-------|------|------|-------|-------|-------|-------|
| 2015                      | 0.58  | 0.70  | 0.68  | 5.18  | 9.05  | 8.18  | 2.46 | 0.18 | 0.00  | 0.56  | 0.23  | 0.55  |
| 2016                      | 1.06  | 0.83  | 1.93  | 3.86  | 4.55  | 2.80  | 1.06 | 1.15 | 0.83  | 0.30  | 0.25  | 0.30  |
| 2017                      | 0.58  | 1.00  | 1.35  | 4.66  | 9.33  | 3.98  | 0.82 | 0.30 | 0.25  | 0.18  | 0.20  | 0.58  |
| 2018                      | 0.26  | 0.70  | 0.10  | 0.88  | 4.35  | 7.18  | 5.78 | 0.55 | 0.63  | 0.60  | 0.85  | 0.88  |
| 2019                      | 0.52  | 0.58  | 1.40  | 1.78  | 4.88  | 11.78 | 8.22 | 2.00 | 2.05  | 1.16  | 1.20  | 1.10  |
| <b>HMPV</b>               |       |       |       |       |       |       |      |      |       |       |       |       |
| 2015                      | 0.66  | 0.40  | 0.98  | 3.64  | 7.10  | 4.20  | 1.48 | 0.33 | 0.13  | 0.46  | 0.43  | 1.68  |
| 2016                      | 3.56  | 4.20  | 8.05  | 12.64 | 8.53  | 2.83  | 0.66 | 1.20 | 0.98  | 0.42  | 1.05  | 1.14  |
| 2017                      | 4.76  | 11.10 | 16.38 | 14.14 | 4.80  | 0.63  | 0.56 | 0.10 | 0.00  | 0.76  | 0.60  | 0.28  |
| 2018                      | 0.86  | 2.95  | 8.60  | 19.12 | 15.33 | 6.00  | 2.82 | 0.73 | 0.48  | 0.08  | 0.18  | 0.15  |
| 2019                      | 0.62  | 1.68  | 6.60  | 9.60  | 17.10 | 8.88  | 4.24 | 2.98 | 1.95  | 1.18  | 0.70  | 1.63  |
| <b>Group A Rotavirus</b>  |       |       |       |       |       |       |      |      |       |       |       |       |
| 2015                      | 14.10 | 22.35 | 28.90 | 16.38 | 6.33  | 2.70  | 1.72 | 3.25 | 5.38  | 2.62  | 1.65  | 0.98  |
| 2016                      | 5.66  | 16.45 | 21.08 | 13.28 | 6.03  | 3.73  | 2.30 | 4.20 | 3.43  | 1.86  | 1.68  | 2.76  |
| 2017                      | 10.38 | 21.68 | 30.33 | 20.26 | 8.13  | 5.53  | 1.68 | 2.30 | 3.45  | 2.34  | 4.35  | 7.38  |
| 2018                      | 14.52 | 19.53 | 16.88 | 10.10 | 4.38  | 4.55  | 1.84 | 1.98 | 0.85  | 1.90  | 3.13  | 4.10  |
| 2019                      | 5.06  | 11.88 | 13.48 | 4.93  | 5.12  | 0.90  | 1.32 | 1.45 | 1.00  | 0.96  | 3.60  | 2.75  |
| <b>Norovirus</b>          |       |       |       |       |       |       |      |      |       |       |       |       |
| 2015                      | 29.20 | 15.30 | 13.35 | 5.82  | 7.53  | 6.73  | 4.86 | 3.20 | 6.18  | 10.36 | 26.28 | 43.98 |
| 2016                      | 38.62 | 21.85 | 20.33 | 13.64 | 7.80  | 4.08  | 3.66 | 3.40 | 2.65  | 9.32  | 28.58 | 41.06 |
| 2017                      | 30.28 | 20.00 | 21.08 | 19.18 | 18.58 | 10.40 | 3.72 | 6.20 | 4.23  | 8.06  | 33.40 | 39.58 |
| 2018                      | 25.46 | 19.20 | 10.78 | 15.74 | 9.30  | 9.90  | 4.34 | 3.20 | 5.35  | 6.28  | 14.95 | 16.90 |
| 2019                      | 39.10 | 25.70 | 24.88 | 32.15 | 22.74 | 10.95 | 5.66 | 4.80 | 1.38  | 2.96  | 1.93  | 30.15 |
| <b>Enteric Adenovirus</b> |       |       |       |       |       |       |      |      |       |       |       |       |
| 2015                      | 1.68  | 3.03  | 1.55  | 1.70  | 2.30  | 1.05  | 0.28 | 0.00 | 0.60  | 2.22  | 0.55  | 1.80  |
| 2016                      | 2.28  | 2.58  | 1.25  | 2.30  | 2.28  | 2.75  | 2.16 | 3.43 | 10.73 | 6.88  | 5.68  | 6.78  |
| 2017                      | 2.10  | 2.23  | 0.55  | 2.86  | 2.90  | 3.05  | 2.78 | 3.30 | 3.50  | 5.04  | 3.43  | 1.13  |
| 2018                      | 2.40  | 1.85  | 2.55  | 3.04  | 2.85  | 5.65  | 4.44 | 6.45 | 6.03  | 3.82  | 3.33  | 2.15  |
| 2019                      | 0.00  | 0.85  | 2.08  | 2.25  | 2.00  | 2.18  | 1.26 | 4.08 | 1.43  | 1.00  | 0.80  | 1.28  |
| <b>Astrovirus</b>         |       |       |       |       |       |       |      |      |       |       |       |       |
| 2015                      | 2.30  | 1.28  | 2.30  | 2.68  | 3.25  | 3.05  | 0.36 | 0.58 | 1.73  | 1.14  | 0.70  | 0.68  |
| 2016                      | 0.94  | 1.18  | 2.48  | 3.20  | 3.40  | 4.30  | 2.52 | 2.28 | 3.43  | 2.82  | 2.05  | 0.86  |
| 2017                      | 11.96 | 1.15  | 1.73  | 5.54  | 3.90  | 4.08  | 3.32 | 2.30 | 1.78  | 2.08  | 0.68  | 2.58  |
| 2018                      | 0.94  | 1.73  | 0.00  | 1.82  | 3.05  | 2.50  | 2.74 | 5.18 | 5.63  | 3.98  | 2.73  | 2.33  |
| 2019                      | 1.44  | 3.05  | 2.70  | 0.98  | 1.26  | 2.20  | 3.14 | 1.50 | 3.23  | 1.28  | 4.80  | 1.50  |

**Table S2. The monthly incidence of febrile convulsion**

|         | January | February | March | April | May  | June | July | August | September | October | November | December | Total | Average |
|---------|---------|----------|-------|-------|------|------|------|--------|-----------|---------|----------|----------|-------|---------|
| 2015    | 1074    | 1338     | 1328  | 1607  | 1934 | 1031 | 1132 | 1346   | 973       | 812     | 959      | 1233     | 14767 | 1231    |
| 2016    | 1252    | 1684     | 1205  | 1481  | 1517 | 1588 | 1289 | 988    | 819       | 842     | 972      | 1574     | 15211 | 1268    |
| 2017    | 972     | 633      | 961   | 1341  | 1336 | 1246 | 1474 | 911    | 756       | 678     | 804      | 1249     | 12361 | 1030    |
| 2018    | 1263    | 763      | 731   | 1048  | 1228 | 1137 | 1115 | 726    | 680       | 642     | 793      | 1187     | 11313 | 943     |
| 2019    | 693     | 533      | 743   | 1087  | 1172 | 1181 | 1147 | 830    | 781       | 720     | 722      | 1030     | 10639 | 887     |
| Total   | 5254    | 4951     | 4968  | 6564  | 7187 | 6183 | 6157 | 4801   | 4009      | 3694    | 4250     | 6273     | 64291 | 5358    |
| Average | 1051    | 990      | 994   | 1313  | 1437 | 1237 | 1231 | 960    | 802       | 739     | 850      | 1255     | 12858 | 1072    |

Figure S1: Positive detection rates of virus during study period

| Mon<br>PDR (%)            | Jan   | Feb   | Mar   | Apr   | May   | Jun   | Jul   | Aug   | Sep   | Oct   | Nov   | Dec   |
|---------------------------|-------|-------|-------|-------|-------|-------|-------|-------|-------|-------|-------|-------|
| <b>HAdV</b>               |       |       |       |       |       |       |       |       |       |       |       |       |
| 2015                      | 5.04  | 2.15  | 2.83  | 4.70  | 4.83  | 5.63  | 3.32  | 3.18  | 2.30  | 6.98  | 9.03  | 8.78  |
| 2016                      | 9.18  | 3.88  | 3.93  | 5.54  | 6.53  | 6.95  | 7.16  | 9.48  | 9.58  | 6.50  | 5.83  | 3.24  |
| 2017                      | 3.72  | 2.53  | 2.43  | 2.74  | 6.05  | 4.73  | 2.96  | 5.18  | 4.33  | 3.78  | 4.73  | 2.60  |
| 2018                      | 2.98  | 2.80  | 4.25  | 5.38  | 5.45  | 6.80  | 5.82  | 9.55  | 13.33 | 11.30 | 10.70 | 7.63  |
| 2019                      | 6.68  | 5.05  | 4.85  | 4.43  | 7.84  | 10.40 | 7.52  | 12.88 | 10.20 | 9.44  | 9.75  | 8.83  |
| <b>HPIV</b>               |       |       |       |       |       |       |       |       |       |       |       |       |
| 2015                      | 0.92  | 0.55  | 0.78  | 6.30  | 17.65 | 11.75 | 7.04  | 6.28  | 8.93  | 4.72  | 9.53  | 4.08  |
| 2016                      | 2.24  | 1.30  | 1.40  | 5.60  | 16.55 | 16.23 | 9.68  | 10.25 | 8.68  | 4.56  | 1.95  | 0.78  |
| 2017                      | 1.58  | 1.70  | 2.98  | 8.38  | 19.43 | 12.83 | 9.68  | 8.95  | 4.60  | 3.04  | 3.33  | 2.68  |
| 2018                      | 0.84  | 1.60  | 3.25  | 9.44  | 19.10 | 16.78 | 11.12 | 7.75  | 4.33  | 4.00  | 1.75  | 1.03  |
| 2019                      | 1.06  | 1.10  | 2.33  | 3.48  | 13.56 | 20.35 | 15.74 | 9.70  | 7.58  | 3.98  | 2.55  | 1.65  |
| <b>HRSV</b>               |       |       |       |       |       |       |       |       |       |       |       |       |
| 2015                      | 8.70  | 2.15  | 1.55  | 0.40  | 0.58  | 0.45  | 0.12  | 0.13  | 0.00  | 0.96  | 4.13  | 14.40 |
| 2016                      | 8.56  | 1.00  | 1.43  | 0.56  | 0.70  | 0.15  | 0.34  | 0.28  | 1.78  | 6.46  | 17.83 | 13.02 |
| 2017                      | 5.16  | 3.83  | 2.53  | 0.64  | 0.10  | 0.23  | 0.60  | 0.85  | 3.30  | 5.24  | 17.25 | 10.73 |
| 2018                      | 4.58  | 4.25  | 3.65  | 0.64  | 0.50  | 0.40  | 0.72  | 1.05  | 1.55  | 4.52  | 13.95 | 11.20 |
| 2019                      | 6.40  | 3.80  | 1.65  | 0.70  | 0.44  | 0.10  | 0.10  | 0.85  | 1.68  | 3.72  | 10.10 | 11.73 |
| <b>IFV</b>                |       |       |       |       |       |       |       |       |       |       |       |       |
| 2015                      | 22.80 | 48.85 | 45.28 | 25.96 | 3.10  | 0.33  | 0.14  | 0.00  | 0.38  | 0.10  | 0.48  | 1.53  |
| 2016                      | 15.24 | 47.55 | 36.95 | 26.60 | 5.00  | 0.70  | 0.22  | 0.28  | 0.25  | 0.40  | 0.80  | 35.50 |
| 2017                      | 26.20 | 7.70  | 8.95  | 12.72 | 5.03  | 2.20  | 1.10  | 0.55  | 0.93  | 0.66  | 4.05  | 41.55 |
| 2018                      | 58.50 | 35.63 | 10.55 | 3.46  | 2.80  | 1.08  | 0.50  | 0.30  | 0.58  | 1.78  | 11.15 | 35.35 |
| 2019                      | 28.20 | 9.13  | 20.80 | 34.85 | 10.52 | 2.10  | 0.40  | 0.35  | 0.63  | 3.44  | 10.08 | 23.95 |
| <b>HCoV</b>               |       |       |       |       |       |       |       |       |       |       |       |       |
| 2015                      | 8.74  | 1.40  | 0.95  | 0.56  | 0.10  | 0.50  | 0.58  | 0.60  | 0.38  | 1.38  | 1.80  | 5.53  |
| 2016                      | 7.96  | 3.98  | 4.95  | 4.26  | 4.90  | 3.08  | 3.94  | 4.53  | 4.68  | 4.24  | 7.80  | 9.82  |
| 2017                      | 10.26 | 6.45  | 5.15  | 3.62  | 2.68  | 2.35  | 1.02  | 1.45  | 1.55  | 2.14  | 5.15  | 7.20  |
| 2018                      | 6.76  | 9.88  | 7.73  | 3.52  | 0.85  | 0.48  | 1.00  | 3.13  | 2.60  | 5.80  | 10.93 | 9.83  |
| 2019                      | 5.48  | 3.70  | 2.83  | 1.38  | 0.92  | 1.68  | 0.64  | 0.45  | 1.05  | 1.94  | 3.35  | 7.55  |
| <b>HRV</b>                |       |       |       |       |       |       |       |       |       |       |       |       |
| 2015                      | 8.80  | 7.73  | 10.08 | 15.84 | 17.10 | 19.30 | 21.62 | 18.10 | 25.40 | 28.82 | 29.03 | 16.78 |
| 2016                      | 8.52  | 3.78  | 12.28 | 15.44 | 19.55 | 16.38 | 19.62 | 19.60 | 18.40 | 24.56 | 20.68 | 8.02  |
| 2017                      | 9.56  | 15.40 | 20.90 | 18.66 | 14.78 | 17.78 | 21.40 | 30.63 | 33.10 | 24.68 | 23.88 | 6.83  |
| 2018                      | 2.52  | 5.95  | 20.63 | 28.34 | 21.53 | 20.18 | 21.14 | 12.70 | 24.63 | 22.08 | 15.70 | 9.78  |
| 2019                      | 8.68  | 14.33 | 18.85 | 16.43 | 19.82 | 17.45 | 23.00 | 13.45 | 21.48 | 22.62 | 19.65 | 11.45 |
| <b>HBov</b>               |       |       |       |       |       |       |       |       |       |       |       |       |
| 2015                      | 0.58  | 0.70  | 0.68  | 5.18  | 9.05  | 8.18  | 2.46  | 0.18  | 0.00  | 0.56  | 0.23  | 0.55  |
| 2016                      | 1.06  | 0.83  | 1.93  | 3.86  | 4.55  | 2.80  | 1.06  | 1.15  | 0.83  | 0.30  | 0.25  | 0.30  |
| 2017                      | 0.58  | 1.00  | 1.35  | 4.66  | 9.33  | 3.98  | 0.82  | 0.30  | 0.25  | 0.18  | 0.20  | 0.58  |
| 2018                      | 0.26  | 0.70  | 0.10  | 0.88  | 4.35  | 7.18  | 5.78  | 0.55  | 0.63  | 0.60  | 0.85  | 0.88  |
| 2019                      | 0.52  | 0.58  | 1.40  | 1.78  | 4.88  | 11.78 | 8.22  | 2.00  | 2.05  | 1.16  | 1.20  | 1.10  |
| <b>HMPV</b>               |       |       |       |       |       |       |       |       |       |       |       |       |
| 2015                      | 0.66  | 0.40  | 0.98  | 3.64  | 7.10  | 4.20  | 1.48  | 0.33  | 0.13  | 0.46  | 0.43  | 1.68  |
| 2016                      | 3.56  | 4.20  | 8.05  | 12.64 | 8.53  | 2.83  | 0.66  | 1.20  | 0.98  | 0.42  | 1.05  | 1.14  |
| 2017                      | 4.76  | 11.10 | 16.38 | 14.14 | 4.80  | 0.63  | 0.56  | 0.10  | 0.00  | 0.76  | 0.60  | 0.28  |
| 2018                      | 0.86  | 2.95  | 8.60  | 19.12 | 15.33 | 6.00  | 2.82  | 0.73  | 0.48  | 0.08  | 0.18  | 0.15  |
| 2019                      | 0.62  | 1.68  | 6.60  | 9.60  | 17.10 | 8.88  | 4.24  | 2.98  | 1.95  | 1.18  | 0.70  | 1.63  |
| <b>Group A Rotavirus</b>  |       |       |       |       |       |       |       |       |       |       |       |       |
| 2015                      | 14.10 | 22.35 | 28.90 | 16.38 | 6.33  | 2.70  | 1.72  | 3.25  | 5.38  | 2.62  | 1.65  | 0.98  |
| 2016                      | 5.66  | 16.45 | 21.08 | 13.28 | 6.03  | 3.73  | 2.30  | 4.20  | 3.43  | 1.86  | 1.68  | 2.76  |
| 2017                      | 10.38 | 21.68 | 30.33 | 20.26 | 8.13  | 5.53  | 1.68  | 2.30  | 3.45  | 2.34  | 4.35  | 7.38  |
| 2018                      | 14.52 | 19.53 | 16.88 | 10.10 | 4.38  | 4.55  | 1.84  | 1.98  | 0.85  | 1.90  | 3.13  | 4.10  |
| 2019                      | 5.06  | 11.88 | 13.48 | 4.93  | 5.12  | 0.90  | 1.32  | 1.45  | 1.00  | 0.96  | 3.60  | 2.75  |
| <b>Norovirus</b>          |       |       |       |       |       |       |       |       |       |       |       |       |
| 2015                      | 29.20 | 15.30 | 13.35 | 5.82  | 7.53  | 6.73  | 4.86  | 3.20  | 6.18  | 10.36 | 26.28 | 43.98 |
| 2016                      | 38.62 | 21.85 | 20.33 | 13.64 | 7.80  | 4.08  | 3.66  | 3.40  | 2.65  | 9.32  | 28.58 | 41.06 |
| 2017                      | 30.28 | 20.00 | 21.08 | 19.18 | 18.58 | 10.40 | 3.72  | 6.20  | 4.23  | 8.06  | 33.40 | 39.58 |
| 2018                      | 25.46 | 19.20 | 10.78 | 15.74 | 9.30  | 9.90  | 4.34  | 3.20  | 5.35  | 6.28  | 14.95 | 16.90 |
| 2019                      | 39.10 | 25.70 | 24.88 | 32.15 | 22.74 | 10.95 | 5.66  | 4.80  | 1.38  | 2.96  | 1.93  | 30.15 |
| <b>Enteric Adenovirus</b> |       |       |       |       |       |       |       |       |       |       |       |       |
| 2015                      | 1.68  | 3.03  | 1.55  | 1.70  | 2.30  | 1.05  | 0.28  | 0.00  | 0.60  | 2.22  | 0.55  | 1.80  |
| 2016                      | 2.28  | 2.58  | 1.25  | 2.30  | 2.28  | 2.75  | 2.16  | 3.43  | 10.73 | 6.88  | 5.68  | 6.78  |
| 2017                      | 2.10  | 2.23  | 0.55  | 2.86  | 2.90  | 3.05  | 2.78  | 3.30  | 3.50  | 5.04  | 3.43  | 1.13  |
| 2018                      | 2.40  | 1.85  | 2.55  | 3.04  | 2.85  | 5.65  | 4.44  | 6.45  | 6.03  | 3.82  | 3.33  | 2.15  |
| 2019                      | 0.00  | 0.85  | 2.08  | 2.25  | 2.00  | 2.18  | 1.26  | 4.08  | 1.43  | 1.00  | 0.80  | 1.28  |
| <b>Astrovirus</b>         |       |       |       |       |       |       |       |       |       |       |       |       |
| 2015                      | 2.30  | 1.28  | 2.30  | 2.68  | 3.25  | 3.05  | 0.36  | 0.58  | 1.73  | 1.14  | 0.70  | 0.68  |
| 2016                      | 0.94  | 1.18  | 2.48  | 3.20  | 3.40  | 4.30  | 2.52  | 2.28  | 3.43  | 2.82  | 2.05  | 0.86  |
| 2017                      | 11.96 | 1.15  | 1.73  | 5.54  | 3.90  | 4.08  | 3.32  | 2.30  | 1.78  | 2.08  | 0.68  | 2.58  |
| 2018                      | 0.94  | 1.73  | 0.00  | 1.82  | 3.05  | 2.50  | 2.74  | 5.18  | 5.63  | 3.98  | 2.73  | 2.33  |
| 2019                      | 1.44  | 3.05  | 2.70  | 0.98  | 1.26  | 2.20  | 3.14  | 1.50  | 3.23  | 1.28  | 4.80  | 1.50  |

**Figure S2. Positive detection rates of virus during study period (plot).**

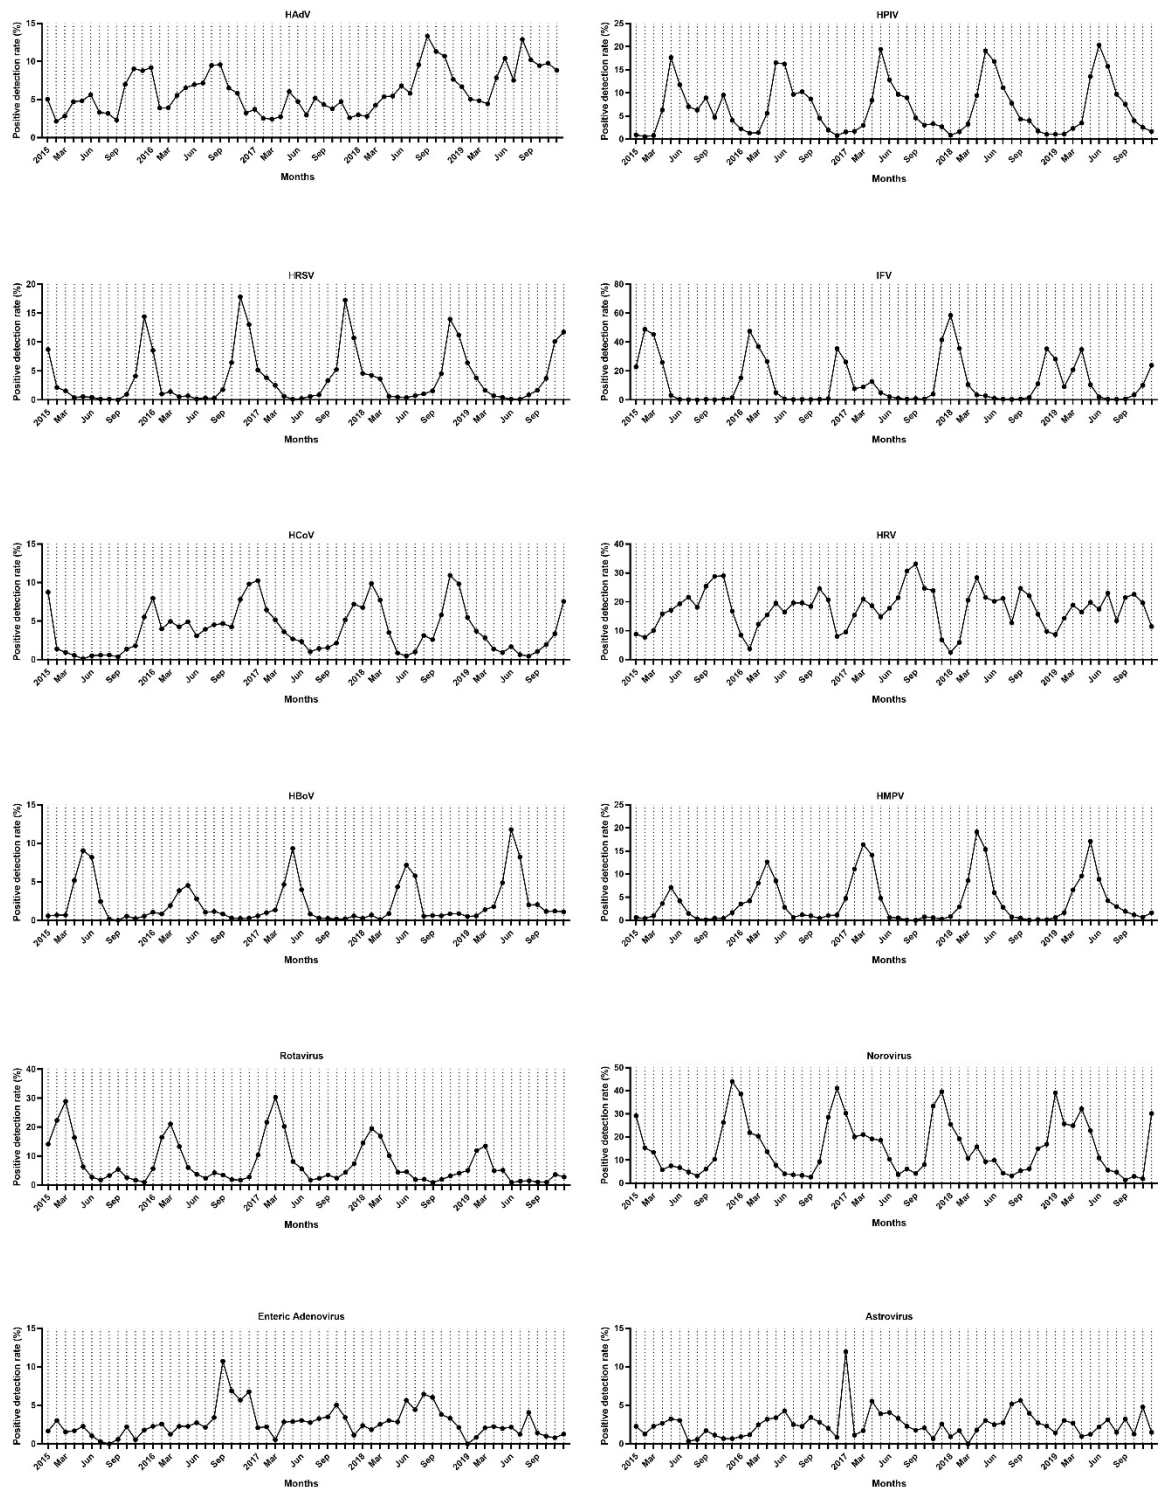

Supplement: s1 [file s1]
